# Supplementary material for: Mitogenomics of historical type specimens of Australasian turtles: clarification of taxonomic confusion and old mitochondrial introgression
Source: PubMed Central journal article supplement (PMC6456567; doi:10.1038/s41598-019-42310-x), 2019-04-09
Supplement: 41598_2019_42310_MOESM1_ESM.pdf [file 41598_2019_42310_MOESM1_ESM.pdf]

# **Mitogenomics of historical type specimens of Australasian turtles: clarification of taxonomic confusion and old mitochondrial introgression**

Christian Kehlmaier, Xiuwen Zhang, Arthur Georges, Patrick D. Campbell, Scott Thomson,  
Uwe Fritz

## ***Scientific Reports***

<https://doi.org/10.1038/s41598-019-42310-x>

## **Supplementary Information**

### **Methods for historical material**

All historical samples were either ethanol- or dry-preserved tissues. For weighing ethanol-preserved tissues, samples were transferred into 1.5 ml vials and dried in a thermomixer set to 56°C for some minutes. DNA was extracted with the Qiagen DNeasy Blood & Tissue Kit (Qiagen, Hilden, Germany) using the ‘Purification of Total DNA from Animal Tissues (Spin-Column) Protocol’ with the following modifications: The amount of buffer ATL (step 1), buffer AL (step 3) and ethanol (step 3) was doubled, and 30 µl proteinase K was used for lysis, which lasted 18 hr in a thermomixer set to 56°C and 450 rpm. All samples were eluted in two times 50 µl buffer AE and 10 min incubated at room temperature. DNA concentration was measured with a Qubit 3.0 Fluorometer (Thermo Fisher Scientific, Waltham, MA) using Qubit HS (High Sensitivity) assays. The length of the DNA molecules was determined with the Agilent 4200 TapeStation System (Agilent, Santa Clara, CA), using the genomic screen tape assay. The amount of tissue used for extraction ranged from 3.8 mg to 35.1 mg (Table S6).

Fresh samples and the tissues used for bait library preparation were buffer- (10% EDTA, 0.5% NaF, 0.5% Thymol, 1% Tris, pH=7.5) or ethanol-preserved (96%). Buffer-preserved samples were washed twice with 300 µl 1x TE by centrifugation for 2 min at 13,000 rpm prior to lysis. Ethanol-preserved tissue was transferred into 1.5 ml vials and dried in a thermomixer set to 50°C for some minutes. DNA was extracted with the Analytik Jena innuPREP DNA Mini Kit (Analytik Jena, Jena, Germany: Protocol 1), adding an RNase digestion after lysis with 10 µl RNase (10 mg/µl) for 30 min at 37°C. All samples were eluted twice using 50 µl elution buffer pre-warmed to 70°C with 10 min incubation at room temperature. DNA concentration was measured with HS assays. Fragment length distribution was analysed with the TapeStation.

NGS library preparation followed Meyer & Kircher<sup>1</sup> with modifications by Fortes & Paijmans<sup>2</sup>. Due to the highly fragmented DNA, no enzymatic or ultrasonic fragmentation was performed. The protocol allows a starting quantity between 100 pg and 1 µg of double-stranded DNA and has a conversion rate of DNA molecules into NGS library molecules of 10–20%<sup>1</sup>. Each NGS library was tagged with a unique eight nucleotide long barcode sequence incorporated into the P7-adaptor of the library molecule (index source: [https://bioinf.eva.mpg.de/multiplex/index\\_8nt\\_dist5.txt](https://bioinf.eva.mpg.de/multiplex/index_8nt_dist5.txt)) and amplified using four units of Herculase II Fusion DNA Polymerase (Agilent) in a single 80 µl PCR reaction. After reaction clean-up, using the MinElute PCR Purification Kit (Qiagen) with an elution in two times 10 µl buffer EB with a 10 min incubation time at room temperature, the indexed NGS libraries were analyzed for their concentration (HS assays) and fragment length distribution, the latter with the 4200 TapeStation System (Agilent) using the D1000 screen tape assay (D1000).

Bait libraries were prepared according to Maricic *et al.*<sup>3</sup> and Horn<sup>4</sup>. This included long-range PCR amplification of high molecular weight DNA from one sample of *Chelodina longicollis* (Museum of Zoology Dresden, sample MTD 7251), *Elseya novaeguineae* (MTD 137) and *Emydura australis* (MTD 3933) each, and subsequent ultrasonication of the PCR products to approximately 150 bp using a Covaris M220 ultrasonicator (Covaris, Woburn, USA). Long-range PCR primers (Table S7) were designed using OLIGO EXPLORER 1.1.2 based on a consensus sequence inferred from an alignment of multiple modern mt-genomes of each genus plus GenBank accession number HQ172157. Two sets of overlapping primer pairs (overlap: 106 bp) covered slightly more than 16 kbp of the mitochondrial genome ranging from the end of the phenylalanine-tRNA to the middle of the control region. A third primer pair failed to amplify a region covering the second half of the control region and part of 12S, probably due to the presence of large repetitive DNA blocks in the control region. Long-range PCR reactions were performed in 50 µl volumes, containing 5–10 ng of DNA and 1 unit of TaKaRa LA Taq DNA Polymerase, Hot-Start Version (Clontech Laboratories Inc., Mountain View, CA), following the reaction mixture recommended by the manufacturer. PCR conditions comprised an initial denaturation at 93°C for 3 min, followed by 35–40 cycles of 93°C for 15 sec, an optimized annealing temperature for 0:30, 68°C for 10 min, before a final elongation at 68°C for 20 min (Table S8). PCR products were visualized and, if necessary, excised from a 2% agarose gel and purified using the peqGOLD Gel Extraction Kit (PEQLAB Biotechnologie GmbH, Erlangen, Germany). To verify the authenticity of the long-range PCR products, the amplified fragments were Sanger-sequenced prior to bait library preparation, using well established sequencing primers for the 12S and *cyt b* regions (Table S7) and standard laboratory procedures<sup>5</sup>. For cycle sequencing, the total reaction volume of 10 µl contained 2 µl sequencing buffer, 1 µl premix, 0.5 µM of the respective primer, 1 µl DNA template, and ultrapure H<sub>2</sub>O. Using the ABI PRISM Big Dye Terminator v.3.1 Cycle Sequencing Kit (Thermo Fisher Scientific), 25 cycles were performed at 96°C for 10 min, 50°C for 5 sec and 60°C for 4 min. Reaction products were purified by gel filtration using the Performa DTR V3 96-Well Short Plate Kit (EdgeBio, Gaithersburg, MD) and 400 µl of a 5% Sephadex solution (GE Healthcare, Munich, Germany). Sequencing was performed on an ABI 3730 Genetic Analyser (Thermo Fisher Scientific).

To enrich sample libraries for mitochondrial DNA fragments, two-rounds of in-solution hybridization capture were performed according to Maricic *et al.*<sup>3</sup> and Horn<sup>4</sup>, using the previously produced bait libraries. The method was designed for an amount of DNA library ranging from 100 ng to 1 µg and includes a library amplification step after each round using Herculanase II Fusion DNA Polymerase (Agilent).

All 23 captured DNA libraries (including extraction and library blanks) were sequenced in the Molecular Laboratory of Senckenberg Dresden in a single run on an Illumina MiSeq sequencing platform using a 2x 300 cycle sequencing kit. The individual NGS libraries were pooled so that the number of aimed reads per library ranged from 1 million to 1.25 million.

After assembling the mitochondrial genomes and aligning them with the GenBank data (see main text for details), the annotation of the final assembly resulted in the following amendments: (1) stop codons of coding genes were excluded from the coding regions as these do not code for any amino acid; (2) gene overlap between coding regions were deleted from the alignment as these short regions cannot be attributed to a single gene, underlie a distinct evolutionary model, and, most importantly, contained a frame shift in one instance that made a sensible alignment impossible. This was the case between *atp8* and *atp6*, *atp6* and *coxIII*, as well as for *ND4L* and *ND4*. (3) Alignment positions that caused frame shifts in coding regions were removed from the alignment, i.e., twice in *ND3* and twice in *ND4L*. (4) An unalignable 141-bp-long non-coding stretch between *ND5* and *ND6* was excluded. (5) MITOS accounted for a split/duplicated *coxI* gene in sample *Chste238* (*cox1-0* + strand 1521 bp; *cox1-1* – strand 51 bp). The 51 bp on the negative strand were not taken into account here. In total, 184 sites were excluded (Table S9) and the final alignment was reduced from 16,473 bp to 16,289 bp (alignment ‘FULL’). Finally, all coding regions were checked for the presence of internal stop codons with MEGA7<sup>6</sup>, and a second alignment was created that only includes the 13 coding genes of the mitochondrion and comprised 11,328 bp (alignment ‘CDS’). Both alignments can be requested from the corresponding author. For information on sequencing reads and genome mapping of the processed type specimens, see Table S10.

**Table S1.** Studied chelid type specimens and European Nucleotide Archive (ENA) accession numbers of their mitogenomes. Museum acronyms: AMNH—American Museum of Natural History, New York; BMNH—The Natural History Museum, London; MSNG—Museo Civico di Storia Naturale di Genova; MTD—Museum für Tierkunde (Museum of Zoology), Senckenberg Natural History Collections Dresden, Dresden; MCZ—Museum of Comparative Zoology, Cambridge, Mass.; OUM—Oxford University Museum, Oxford, UK; WAM—Western Australian Museum, Perth; ZMB—Museum für Naturkunde, Berlin.

| Nominal taxon                                                                      | Original type locality                                                                                                                                                                                                  | Type material                                                                 | Condition                                                   | Preserved since | Accession number |
|------------------------------------------------------------------------------------|-------------------------------------------------------------------------------------------------------------------------------------------------------------------------------------------------------------------------|-------------------------------------------------------------------------------|-------------------------------------------------------------|-----------------|------------------|
| <i>Chelodina gunaleni</i> McCord & Joseph-Ouni, 2007                               | Uta River Basin, Mimika District, Central Papua Province (Irian Jaya), Indonesia <sup>7</sup>                                                                                                                           | AMNH R160133, holotype                                                        | Alcohol-preserved                                           | 2007            | LR215671         |
| <i>Chelodina kuchlingi</i> Cann, 1997                                              | Kalumburu, N. W. Australia (14°18'S 126°28'E) <sup>8</sup>                                                                                                                                                              | WAM R29411, holotype                                                          | Alcohol-preserved                                           | ca. 1970        | LR215672         |
| <i>Chelodina mccordi</i> Rhodin, 1994                                              | Danau Naloek, near Busalangga, ca. 11 km northeast of Tudamedia and ca. 8 km southwest of Ba'a, elevation ca. 115 m, southwestern Roti Island (10°48' S 123°00' E), East Nusa Tenggara Province, Indonesia <sup>9</sup> | MCZ 176731, paratype                                                          | Alcohol-preserved                                           | 1994            | LR215673         |
| <i>Chelodina mccordi roteensis</i> McCord, Joseph-Ouni & Hagen, 2007               | Lake Enduy, eastern Rote Island, East Nusa Tenggara Province, Indonesia <sup>10</sup>                                                                                                                                   | AMNH R160132, holotype                                                        | Alcohol-preserved                                           | 2007            | LR215674         |
| <i>Chelodina mccordi timorlestensis</i> Kuchling, Rhodin, Ibarondo & Trainor, 2007 | Plain of Lake Iralalaro (= Lagoa Ira Lalaro) (ca. 08°28' S 127°07' E, ca. 334 m), east of Lospalos, Lautém District, Timor-Leste <sup>11</sup>                                                                          | WAM 165888, holotype                                                          | Alcohol-preserved (tissues preserved prior to conservation) | 2007            | LR215675         |
| <i>Chelodina novaeguineae</i> Boulenger, 1888                                      | Katow, S. E. New Guinea <sup>12</sup>                                                                                                                                                                                   | BMNH 1946.1.22.36, lectotype (designated by Wells & Wellington) <sup>13</sup> | Dry, mounted                                                | ca. 1885        | LR215676         |
| <i>Chelodina oblonga</i> Gray, 1841                                                | Western Australia <sup>14</sup>                                                                                                                                                                                         | BMNH 1947.3.5.89, holotype                                                    | Dry, mounted                                                | ca. 1840        | LR215677         |
| <i>Chelodina reimanni</i> Philippen & Großmann, 1990                               | Merauke River, West-Irian, New Guinea <sup>15</sup>                                                                                                                                                                     | MTD 29178, holotype                                                           | Alcohol-preserved                                           | 1990            | LR215678         |
| <i>Chelodina reimanni</i> Philippen & Großmann, 1990                               | Merauke River, West-Irian, New Guinea <sup>15</sup>                                                                                                                                                                     | MTD 42828, paratype                                                           | Alcohol-preserved                                           | 1990            | LR215679         |
| <i>Chelodina siebenrocki</i> Werner, 1901                                          | Deutsch Neu-Guinea <sup>16</sup>                                                                                                                                                                                        | ZMB 16491, holotype                                                           | Alcohol-preserved                                           | ca. 1900        | LR215680         |

**Table S1.** *Continued.*

| Nominal taxon                                                 | Original type locality                                                                            | Type material                                                                       | Condition                    | Preserved since | Accession number |
|---------------------------------------------------------------|---------------------------------------------------------------------------------------------------|-------------------------------------------------------------------------------------|------------------------------|-----------------|------------------|
| <i>Chelodina timorensis</i> McCord, Joseph-Ouni & Hagen, 2007 | Lake Ira Lalaro, Lautem District (regency), Tutuala Subdistrict, eastern East Timor <sup>17</sup> | AMNH R160135, holotype                                                              | Alcohol-preserved            | 2007            | LR215681         |
| <i>Eelseya intermedia</i> Gray, 1872                          | North Australia, upper part of Victoria <sup>18</sup>                                             | BMNH 1947.3.4.14, holotype                                                          | Shell with mummified tissues | ca. 1870        | LR215682         |
| <i>Euchelymys subglobosa</i> Krefft, 1876                     | Amama River, S. E. New Guinea <sup>19</sup>                                                       | MSNG CE 2320, holotype                                                              | Dry, mummified               | ca. 1875        | LR215683         |
| <i>Hydraspis australis</i> Gray, 1841                         | Unknown <sup>14</sup>                                                                             | BMNH 1947.3.4.36, holotype                                                          | Dry, mounted                 | ca. 1840        | LR215684         |
| <i>Hydraspis victoriae</i> Gray, 1842                         | Victoria River, north-west coast of New Holland <sup>20</sup>                                     | BMNH 1947.3.5.95, lectotype (designated by Wells & Wellington) <sup>13,**</sup>     | Shell with mummified tissues | ca. 1840        | LR215685         |
| <i>Hydraspis victoriae</i> Gray, 1842                         | Victoria River, north-west coast of New Holland <sup>20</sup>                                     | BMNH 1947.3.5.96, paralectotype (designated by Wells & Wellington) <sup>13,**</sup> | Shell with mummified tissues | ca. 1840        | LR215686         |
| <i>Phrynops bellii</i> Gray, 1844                             | Unknown <sup>21</sup>                                                                             | OUM 8460, holotype                                                                  | Mummified dry juvenile       | ca. 1840        | LR215687         |
| <i>Platemys novaeguineae</i> Meyer, 1874                      | Neu-Guinea <sup>22</sup>                                                                          | MTD 8222, holotype                                                                  | Alcohol-preserved            | ca. 1873        | failed           |
| <i>Testudo longicollis</i> Shaw, 1794                         | Australia, Australasia or New Holland <sup>23</sup>                                               | BMNH 1947.3.5.86, holotype                                                          | Dry, mounted                 | ca. 1790        | LR215688         |

\* See discussion in Iverson *et al.*<sup>24</sup>.

\*\* The putative paralectotype is to be identified with the holotype of *Hydraspis victoriae* Gray, 1841, see discussion in text.

**Table S2.** Studied fresh material and GenBank data.

| Taxon                                                | Collection site                                                                              | Lab code | Specimen reference* | Accession number | Source                              |
|------------------------------------------------------|----------------------------------------------------------------------------------------------|----------|---------------------|------------------|-------------------------------------|
| <i>Chelodina burrungandjii</i>                       | Australia: Western Australia: King Edward River, Surveyors Pool (-14.671, 125.735)           | Chbur671 | UC 0671             | KY776447         | Present study                       |
| <i>Chelodina canni</i>                               | Australia: Northern Territory: Roper River, Sunday Creek (-16.118, 133.572)                  | Chcan657 | UC 0657             | KY776448         | Present study                       |
| <i>Chelodina colliei</i>                             | Australia: Western Australia: Swan River, Perth (-31.950, 115.850)                           | Chcol227 | UC 0227             | KY776449         | Present study                       |
| <i>Chelodina expansa</i>                             | Australia: Queensland: Fitzroy River, Moura (-24.603, 149.913)                               | —        | AA032872            | KY705230         | Present study                       |
| <i>Chelodina expansa</i>                             | Australia: New South Wales: Murray River, Mungabareena (-36.093, 146.948)                    | Chexp175 | UC 0175             | KY776450         | Present study                       |
| <i>Chelodina longicollis</i>                         | Australia: Australian Capital Territory (-35.190, 149.110)                                   | —        | AA045603            | KJ713173         | Zhang & Georges <sup>25</sup>       |
| <i>Chelodina mccordi</i>                             | Indonesia: Roti Island ( <i>ca.</i> -10.762, 123.123)                                        | —        | UC 0493             | KY705231         | Present study                       |
| <i>Chelodina parkeri</i>                             | Papua New Guinea: Fly River, Suki-Aramba Swamp (-8.245, 141.767)                             | —        | AA042607            | KY705232         | Present study                       |
| <i>Chelodina pritchardi</i>                          | Papua New Guinea: Laloki River (-9.031, 146.869)                                             | —        | AA021711            | KY705233         | Present study                       |
| <i>Chelodina oblonga</i> sensu Thomson <sup>26</sup> | Australia: Northern Territory: Finnis River, Knuckies Lagoon (-12.426, 130.938)              | Chrug313 | UC 0313             | KY776451         | Present study                       |
| <i>Chelodina oblonga</i> sensu Thomson <sup>26</sup> | Unknown                                                                                      | —        | —                   | HQ172157         | Wang <i>et al.</i> <sup>27</sup>    |
| <i>Chelodina steindachneri</i>                       | Australia: Western Australia: Millbillillie Station (-26.621, 120.330)                       | Chste238 | UC 0238             | KY776452         | Present study                       |
| <i>Elseya albagula</i>                               | Australia: Queensland: Burnett River, Grays Waterhole (-25.536, 151.658)                     | Elalb183 | UC 0183             | KY776453         | Present study                       |
| <i>Elseya branderhorsti</i>                          | Unknown                                                                                      | —        | —                   | KC692461         | Nie & Hu, unpublished               |
| <i>Elseya dentata</i>                                | Australia: Northern Territory: Daly River, Ooloo Crossing (-14.071, 131.251)                 | Elden260 | UC 0260             | KY779843         | Present study                       |
| <i>Elseya dentata</i>                                | Australia: Northern Territory: Victoria River, Victoria River Crossing (-15.633, 131.133)    | Elden258 | UC 0258             | KY779842         | Present study                       |
| <i>Elseya flaviventralis</i>                         | Australia: Northern Territory: South Alligator River, Pine Creek Crossing (-13.499, 132.471) | Elmag255 | UC 0255             | KY776454         | Present study                       |
| <i>Elusor macrurus</i>                               | Australia: Queensland: Mary River                                                            | —        | —                   | KU736930         | Schmidt <i>et al.</i> <sup>28</sup> |

**Table S2.** *Continued.*

| Taxon                         | Collection site                                                                    | Lab code | Specimen reference* | Accession number | Source                                 |
|-------------------------------|------------------------------------------------------------------------------------|----------|---------------------|------------------|----------------------------------------|
| <i>Elusor macrurus</i>        | Australia: Queensland: Mary River                                                  | Elmac219 | UC 0219             | KY857551         | Present study                          |
| <i>Emydura macquarii</i>      | Australia: New South Wales: Murray River, Mungabareena (-36.093, 146.948)          | Emmac119 | UC 0119             | KY857552         | Present study                          |
| " <i>Emydura subglobosa</i> " | Unknown                                                                            | —        | —                   | KC692462         | Nie & Hou, unpublished                 |
| <i>Emydura subglobosa</i>     | Australia: Northern Territory: Roper River, Mataranka Springs (-14.925, 133.134)   | Emsub205 | UC 0205             | KY857553         | Present study                          |
| <i>Emydura tanybaraga</i>     | Australia: Queensland: Mitchell River                                              | Emtan220 | UC 0220             | KY857559         | Present study                          |
| <i>Emydura victoriae</i>      | Australia: Northern Territory: Daly River, Ooloo Crossing (-14.071, 131.251)       | Emvic245 | UC 0245             | KY857554         | Present study                          |
| <i>Myuchelys bellii</i>       | Australia: New South Wales: Gwydir River (-30.496, 151.133)                        | —        | UC 0177             | KY924930         | Present study                          |
| <i>Myuchelys georgesi</i>     | Australia: New South Wales: Bellinger River (-30.444, 152.622)                     | Mygeo131 | UC 0131             | KY857555         | Present study                          |
| <i>Myuchelys latisternum</i>  | Australia: New South Wales: Tweed River, Byangum (-28.355, 153.360)                | Mylat127 | UC 0127             | KY857556         | Present study                          |
| <i>Myuchelys purvisi</i>      | Australia: New South Wales: Manning River (-31.733, 151.850)                       | Mypur130 | UC 0130             | KY883378         | Present study                          |
| <i>Pseudemydura umbrina</i>   | Australia: Western Australia: Ellen Brook Nature Reserve, Perth (-31.750, 116.033) | —        | —                   | KY486272         | Zhang <i>et al.</i> <sup>29</sup>      |
| <i>Rheodytes leukops</i>      | Australia: Queensland: Fitzroy River                                               | Rhleu239 | UC 0239             | KY857558         | Present study                          |
| South American taxa           |                                                                                    |          |                     |                  |                                        |
| <i>Chelus fimbriata</i>       | Unknown                                                                            | —        | —                   | HQ172156         | Wang <i>et al.</i> <sup>27</sup>       |
| <i>Mesoclemmys hogei</i>      | Unknown                                                                            | —        | —                   | MF615513         | Prosdocimi <i>et al.</i> , unpublished |
| <i>Platemys platycephala</i>  | Unknown                                                                            | —        | —                   | KC692464         | Ni & Hou, unpublished                  |
| Outgroup                      |                                                                                    |          |                     |                  |                                        |
| <i>Pelomedusa variabilis</i>  | Unknown                                                                            | —        | —                   | AF039066         | Zardoya & Meyer <sup>30</sup>          |

\*Specimen reference provides a link to full data held in the Wildlife Tissue Collection at the University of Canberra.

**Table S3.** Evolutionary models for the ‘FULL alignment’ suggested by PARTITIONFINDER2 for the RAxML and MRBAYES analyses.

| Alignment position | Partition  | Model RAxML | Model MRBAYES |
|--------------------|------------|-------------|---------------|
| 1–24               | tRNA       | GTR+I+G     | GTR+I+G       |
| 25–1034            | 12S        | GTR+I+G     | GTR+I+G       |
| 1035–1110          | tRNA       | GTR+I+G     | GTR+I+G       |
| 1111–2792          | 16S        | GTR+G       | GTR+G         |
| 2793–2873          | tRNA       | GTR+I+G     | GTR+I+G       |
| 2874–3842\3        | ND1_pos1   | GTR+I+G     | SYM+G         |
| 2875–3842\3        | ND1_pos2   | GTR+I+G     | HKY+I+G       |
| 2876–3842\3        | ND1_pos3   | GTR+G       | HKY+G         |
| 3843–4058          | tRNA       | GTR+I+G     | GTR+I+G       |
| 4059–5100\3        | ND2_pos1   | GTR+I+G     | GTR+I+G       |
| 4060–5100\3        | ND2_pos2   | GTR+I+G     | GTR+I+G       |
| 4061–5100\3        | ND2_pos3   | GTR+I+G     | HKY+I+G       |
| 5101–5500          | tRNA       | GTR+I+G     | GTR+I+G       |
| 5501–7042\3        | coxI_pos1  | GTR+G       | SYM+G         |
| 5502–7042\3        | coxI_pos2  | GTR+I+G     | HKY+I         |
| 5503–7042\3        | coxI_pos3  | GTR+I+G     | GTR+I+G       |
| 7043–7217          | tRNA       | GTR+I+G     | GTR+I+G       |
| 7218–7904\3        | coxII_pos1 | GTR+G       | SYM+G         |
| 7219–7904\3        | coxII_pos2 | GTR+I+G     | HKY+I         |
| 7220–7904\3        | coxII_pos3 | GTR+G       | GTR+G         |
| 7905–7984          | tRNA       | GTR+I+G     | GTR+I+G       |
| 7985–8140\3        | atp8_pos1  | GTR+G       | GTR+G         |
| 7986–8140\3        | atp8_pos2  | GTR+G       | HKY+G         |
| 7987–8140\3        | atp8_pos3  | GTR+G       | HKY+G         |
| 8141–8810\3        | atp6_pos1  | GTR+I+G     | HKY+I+G       |
| 8142–8810\3        | atp6_pos2  | GTR+I+G     | GTR+I+G       |
| 8143–8810\3        | atp6_pos3  | GTR+I+G     | HKY+G         |

| Alignment position | Partition   | Model RAxML | Model MRBAYES |
|--------------------|-------------|-------------|---------------|
| 8811–9584\3        | coxIII_pos1 | GTR+I+G     | K80+I+G       |
| 8812–9584\3        | coxIII_pos2 | GTR+I+G     | HKY+I+G       |
| 8813–9584\3        | coxIII_pos3 | GTR+I+G     | GTR+G         |
| 9585–9656          | tRNA        | GTR+I+G     | GTR+I+G       |
| 9657–10001\3       | ND3_pos1    | GTR+I+G     | HKY+G         |
| 9658–10001\3       | ND3_pos2    | GTR+G       | HKY+G         |
| 9659–10001\3       | ND3_pos3    | GTR+G       | HKY+G         |
| 10002–10073        | tRNA        | GTR+I+G     | GTR+I+G       |
| 10074–10361\3      | ND4L_pos1   | GTR+G       | HKY+G         |
| 10075–10361\3      | ND4L_pos2   | GTR+G       | HKY+G         |
| 10076–10361\3      | ND4L_pos3   | GTR+G       | GTR+G         |
| 10362–11732\3      | ND4_pos1    | GTR+I+G     | GTR+I+G       |
| 10363–11732\3      | ND4_pos2    | GTR+I+G     | GTR+I+G       |
| 10364–11732\3      | ND4_pos3    | GTR+G       | GTR+G         |
| 11733–11948        | tRNA        | GTR+I+G     | GTR+I+G       |
| 11949–13763\3      | ND5_pos1    | GTR+G       | GTR+G         |
| 11950–13763\3      | ND5_pos2    | GTR+G       | HKY+G         |
| 11951–13763\3      | ND5_pos3    | GTR+I+G     | GTR+I+G       |
| 13764–14292\3      | ND6_pos3    | GTR+G       | HKY+G         |
| 13765–14292\3      | ND6_pos2    | GTR+I+G     | HKY+I+G       |
| 13766–14292\3      | ND6_pos1    | GTR+G       | HKY+G         |
| 14293–14463        | tRNA        | GTR+I+G     | GTR+I+G       |
| 14464–15603\3      | cytb_pos1   | GTR+G       | GTR+G         |
| 14465–15603\3      | cytb_pos2   | GTR+G       | GTR+G         |
| 14466–15603\3      | cytb_pos3   | GTR+G       | GTR+G         |
| 15604–15753        | tRNA        | GTR+I+G     | GTR+I+G       |
| 15754–16289        | CR          | GTR+G       | GTR+G         |

**Table S4.** Evolutionary models for the ‘CDS alignment’ suggested by PARTITIONFINDER2 for the RAxML and MRBAYES analyses.

| Alignment position | Partition   | Model RAxML | Model MrBayes |
|--------------------|-------------|-------------|---------------|
| 1–969\3            | ND1_pos1    | GTR+I+G     | SYM+G         |
| 2–970\3            | ND1_pos2    | GTR+I+G     | HKY+I+G       |
| 3–971\3            | ND1_pos3    | GTR+G       | HKY+G         |
| 970–2011\3         | ND2_pos1    | GTR+I+G     | GTR+I+G       |
| 971–2011\3         | ND2_pos2    | GTR+I+G     | GTR+I+G       |
| 972–2011\3         | ND2_pos3    | GTR+I+G     | HKY+I+G       |
| 2012–3553\3        | coxI_pos1   | GTR+G       | SYM+G         |
| 2013–3553\3        | coxI_pos2   | GTR+G       | HKY+I         |
| 2014–3553\3        | coxI_pos3   | GTR+I+G     | GTR+I+G       |
| 3554–4240\3        | coxII_pos1  | GTR+G       | GTR+I         |
| 3555–4240\3        | coxII_pos2  | GTR+I+G     | HKY+I         |
| 3556–4240\3        | coxII_pos3  | GTR+G       | GTR+G         |
| 4241–4396\3        | atp8_pos1   | GTR+G       | GTR+G         |
| 4242–4396\3        | atp8_pos2   | GTR+G       | HKY+G         |
| 4243–4396\3        | atp8_pos3   | GTR+G       | HKY+G         |
| 4397–5066\3        | atp6_pos1   | GTR+I+G     | HKY+I+G       |
| 4398–5066\3        | atp6_pos2   | GTR+I+G     | GTR+I+G       |
| 4399–5066\3        | atp6_pos3   | GTR+G       | HKY+G         |
| 5067–5840\3        | coxIII_pos1 | GTR+I+G     | K80+I+G       |
| 5068–5840\3        | coxIII_pos2 | GTR+I+G     | HKY+I+G       |

| Alignment position | Partition   | Model RAxML | Model MrBayes |
|--------------------|-------------|-------------|---------------|
| 5069–5840\3        | coxIII_pos3 | GTR+G       | GTR+G         |
| 5841–6185\3        | ND3_pos1    | GTR+I+G     | HKY+G         |
| 5842–6185\3        | ND3_pos2    | GTR+G       | HKY+G         |
| 5843–6185\3        | ND3_pos3    | GTR+G       | HKY+G         |
| 6186–6473\3        | ND4L_pos1   | GTR+G       | HKY+G         |
| 6187–6473\3        | ND4L_pos2   | GTR+G       | HKY+G         |
| 6188–6473\3        | ND4L_pos3   | GTR+G       | GTR+G         |
| 6474–7844\3        | ND4_pos1    | GTR+I+G     | GTR+I+G       |
| 6475–7844\3        | ND4_pos2    | GTR+I+G     | GTR+I+G       |
| 6476–7844\3        | ND4_pos3    | GTR+I+G     | GTR+G         |
| 7845–9659\3        | ND5_pos1    | GTR+G       | GTR+G         |
| 7846–9659\3        | ND5_pos2    | GTR+I+G     | HKY+I+G       |
| 7847–9659\3        | ND5_pos3    | GTR+I+G     | GTR+I+G       |
| 9660–10188\3       | ND6_pos3    | GTR+G       | HKY+G         |
| 9661–10188\3       | ND6_pos2    | GTR+I+G     | HKY+I+G       |
| 9662–10188\3       | ND6_pos1    | GTR+G       | HKY+G         |
| 10189–11328\3      | cytb_pos1   | GTR+G       | GTR+G         |
| 10190–11328\3      | cytb_pos2   | GTR+G       | GTR+G         |
| 10191–11328\3      | cytb_pos3   | GTR+G       | GTR+G         |

**Table S5.** Uncorrected *p* distances of mitogenomes of Australasian chelid turtles based on 16,473 aligned sites.

|    |                                                  | 1      | 2      | 3      | 4      | 5      | 6      | 7      | 8      | 9      | 10     | 11     | 12     | 13     | 14     | 15     | 16     | 17     | 18     | 19     | 20     | 21     | 22     | 23     | 24     |
|----|--------------------------------------------------|--------|--------|--------|--------|--------|--------|--------|--------|--------|--------|--------|--------|--------|--------|--------|--------|--------|--------|--------|--------|--------|--------|--------|--------|
| 1  | <i>Chelodina parkeri</i> KY705232                | —      |        |        |        |        |        |        |        |        |        |        |        |        |        |        |        |        |        |        |        |        |        |        |        |
| 2  | <i>Chelodina steindachneri</i> Chste238          | 0.1080 | —      |        |        |        |        |        |        |        |        |        |        |        |        |        |        |        |        |        |        |        |        |        |        |
| 3  | <i>Chelodina oblonga</i> holotype                | 0.1002 | 0.0653 | —      |        |        |        |        |        |        |        |        |        |        |        |        |        |        |        |        |        |        |        |        |        |
| 4  | <i>Chelodina colliei</i> Chcol227                | 0.1007 | 0.0653 | 0.0031 | —      |        |        |        |        |        |        |        |        |        |        |        |        |        |        |        |        |        |        |        |        |
| 5  | <i>Testudo longicollis</i> holotype              | 0.1074 | 0.0760 | 0.0649 | 0.0649 | —      |        |        |        |        |        |        |        |        |        |        |        |        |        |        |        |        |        |        |        |
| 6  | <i>Chelodina expansa</i> Chexp175                | 0.1080 | 0.0766 | 0.0657 | 0.0658 | 0.0132 | —      |        |        |        |        |        |        |        |        |        |        |        |        |        |        |        |        |        |        |
| 7  | <i>Chelodina pritchardi</i> KY705233             | 0.1104 | 0.0704 | 0.0699 | 0.0703 | 0.0435 | 0.0437 | —      |        |        |        |        |        |        |        |        |        |        |        |        |        |        |        |        |        |
| 8  | <i>Chelodina gunaleni</i> holotype               | 0.1102 | 0.0809 | 0.0710 | 0.0709 | 0.0403 | 0.0412 | 0.0318 | —      |        |        |        |        |        |        |        |        |        |        |        |        |        |        |        |        |
| 9  | <i>Chelodina novaeguineae</i> lectotype          | 0.1099 | 0.0797 | 0.0702 | 0.0700 | 0.0393 | 0.0400 | 0.0311 | 0.0137 | —      |        |        |        |        |        |        |        |        |        |        |        |        |        |        |        |
| 10 | <i>Chelodina reimanni</i> paratype               | 0.1101 | 0.0797 | 0.0703 | 0.0702 | 0.0397 | 0.0402 | 0.0311 | 0.0139 | 0.0021 | —      |        |        |        |        |        |        |        |        |        |        |        |        |        |        |
| 11 | <i>Chelodina reimanni</i> holotype               | 0.1102 | 0.0799 | 0.0705 | 0.0704 | 0.0399 | 0.0404 | 0.0313 | 0.0141 | 0.0022 | 0.0002 | —      |        |        |        |        |        |        |        |        |        |        |        |        |        |
| 12 | <i>Chelodina mccordi</i> paratype                | 0.1085 | 0.0772 | 0.0699 | 0.0699 | 0.0388 | 0.0415 | 0.0458 | 0.0420 | 0.0421 | 0.0423 | 0.0425 | —      |        |        |        |        |        |        |        |        |        |        |        |        |
| 13 | <i>Chelodina mccordi</i> KY705231                | 0.1084 | 0.0772 | 0.0698 | 0.0699 | 0.0387 | 0.0414 | 0.0458 | 0.0420 | 0.0420 | 0.0423 | 0.0425 | 0.0001 | —      |        |        |        |        |        |        |        |        |        |        |        |
| 14 | <i>Chelodina mccordi roteensis</i> holotype      | 0.1081 | 0.0770 | 0.0697 | 0.0698 | 0.0386 | 0.0414 | 0.0455 | 0.0417 | 0.0418 | 0.0420 | 0.0422 | 0.0007 | 0.0006 | —      |        |        |        |        |        |        |        |        |        |        |
| 15 | <i>Chelodina mccordi timorlestensis</i> holotype | 0.1093 | 0.0782 | 0.0700 | 0.0701 | 0.0381 | 0.0407 | 0.0452 | 0.0409 | 0.0405 | 0.0407 | 0.0409 | 0.0101 | 0.0102 | 0.0102 | —      |        |        |        |        |        |        |        |        |        |
| 16 | <i>Chelodina timorensis</i> holotype             | 0.1093 | 0.0783 | 0.0702 | 0.0703 | 0.0383 | 0.0409 | 0.0453 | 0.0411 | 0.0405 | 0.0408 | 0.0410 | 0.0103 | 0.0104 | 0.0104 | 0.0002 | —      |        |        |        |        |        |        |        |        |
| 17 | <i>Chelodina burrungandjii</i> Chbur671          | 0.1104 | 0.0793 | 0.0717 | 0.0721 | 0.0395 | 0.0408 | 0.0457 | 0.0422 | 0.0432 | 0.0431 | 0.0433 | 0.0286 | 0.0285 | 0.0285 | 0.0277 | 0.0279 | —      |        |        |        |        |        |        |        |
| 18 | <i>Chelodina canni</i> Chcan657                  | 0.1076 | 0.0766 | 0.0689 | 0.0690 | 0.0366 | 0.0382 | 0.0435 | 0.0399 | 0.0398 | 0.0401 | 0.0401 | 0.0245 | 0.0244 | 0.0244 | 0.0242 | 0.0244 | 0.0236 | —      |        |        |        |        |        |        |
| 19 | <i>Chelodina expansa</i> KY705230                | 0.1082 | 0.0770 | 0.0686 | 0.0686 | 0.0358 | 0.0373 | 0.0429 | 0.0385 | 0.0383 | 0.0385 | 0.0387 | 0.0238 | 0.0238 | 0.0238 | 0.0235 | 0.0236 | 0.0223 | 0.0140 | —      |        |        |        |        |        |
| 20 | <i>Chelodina longicollis</i> KJ713173            | 0.1082 | 0.0766 | 0.0687 | 0.0687 | 0.0356 | 0.0371 | 0.0422 | 0.0379 | 0.0373 | 0.0376 | 0.0378 | 0.0230 | 0.0230 | 0.0230 | 0.0229 | 0.0231 | 0.0219 | 0.0133 | 0.0025 | —      |        |        |        |        |
| 21 | <i>Chelodina kuchlingi</i> holotype              | 0.1037 | 0.0780 | 0.0667 | 0.0672 | 0.0615 | 0.0621 | 0.0658 | 0.0640 | 0.0620 | 0.0624 | 0.0626 | 0.0588 | 0.0588 | 0.0585 | 0.0572 | 0.0573 | 0.0612 | 0.0596 | 0.0585 | 0.0578 | —      |        |        |        |
| 22 | <i>Chelodina oblonga</i> sensu Thomson Chrug313  | 0.1115 | 0.0895 | 0.0795 | 0.0793 | 0.0877 | 0.0877 | 0.0900 | 0.0924 | 0.0912 | 0.0915 | 0.0917 | 0.0915 | 0.0914 | 0.0911 | 0.0910 | 0.0912 | 0.0909 | 0.0898 | 0.0900 | 0.0896 | 0.0378 | —      |        |        |
| 23 | <i>Chelodina oblonga</i> sensu Thomson HQ172157  | 0.1110 | 0.0878 | 0.0815 | 0.0812 | 0.0900 | 0.0904 | 0.0915 | 0.0941 | 0.0925 | 0.0924 | 0.0925 | 0.0913 | 0.0913 | 0.0910 | 0.0910 | 0.0912 | 0.0921 | 0.0908 | 0.0913 | 0.0910 | 0.0645 | 0.0571 | —      |        |
| 24 | <i>Chelodina siebenrocki</i> holotype            | 0.1099 | 0.0855 | 0.0800 | 0.0798 | 0.0886 | 0.0887 | 0.0899 | 0.0921 | 0.0908 | 0.0907 | 0.0908 | 0.0897 | 0.0896 | 0.0894 | 0.0893 | 0.0895 | 0.0899 | 0.0887 | 0.0887 | 0.0885 | 0.0629 | 0.0553 | 0.0151 | —      |
| 25 | <i>Elseya dentata</i> Elden260                   | 0.1808 | 0.1843 | 0.1836 | 0.1835 | 0.1832 | 0.1837 | 0.1837 | 0.1828 | 0.1823 | 0.1826 | 0.1827 | 0.1821 | 0.1821 | 0.1817 | 0.1826 | 0.1826 | 0.1841 | 0.1833 | 0.1835 | 0.1830 | 0.1773 | 0.1856 | 0.1865 | 0.1846 |
| 26 | <i>Elseya intermedia</i> holotype                | 0.1806 | 0.1843 | 0.1841 | 0.1839 | 0.1828 | 0.1833 | 0.1836 | 0.1829 | 0.1820 | 0.1825 | 0.1826 | 0.1815 | 0.1815 | 0.1811 | 0.1825 | 0.1825 | 0.1844 | 0.1834 | 0.1834 | 0.1831 | 0.1771 | 0.1854 | 0.1862 | 0.1844 |
| 27 | <i>Elseya dentata</i> Elden258                   | 0.1806 | 0.1845 | 0.1843 | 0.1841 | 0.1829 | 0.1834 | 0.1837 | 0.1829 | 0.1820 | 0.1825 | 0.1826 | 0.1815 | 0.1815 | 0.1812 | 0.1825 | 0.1826 | 0.1843 | 0.1833 | 0.1834 | 0.1831 | 0.1774 | 0.1856 | 0.1862 | 0.1845 |
| 28 | <i>Elseya branderhorsti</i> KC692461             | 0.1809 | 0.1844 | 0.1845 | 0.1840 | 0.1835 | 0.1840 | 0.1835 | 0.1833 | 0.1826 | 0.1827 | 0.1827 | 0.1819 | 0.1819 | 0.1817 | 0.1826 | 0.1826 | 0.1840 | 0.1830 | 0.1831 | 0.1827 | 0.1775 | 0.1850 | 0.1854 | 0.1835 |
| 29 | <i>Elseya flaviventralis</i> Elmaq255            | 0.1810 | 0.1840 | 0.1838 | 0.1835 | 0.1819 | 0.1825 | 0.1826 | 0.1819 | 0.1808 | 0.1812 | 0.1812 | 0.1803 | 0.1803 | 0.1801 | 0.1806 | 0.1806 | 0.1817 | 0.1814 | 0.1814 | 0.1811 | 0.1758 | 0.1835 | 0.1857 | 0.1840 |
| 30 | <i>Elseya albaquila</i> Elalb183                 | 0.1828 | 0.1856 | 0.1834 | 0.1835 | 0.1846 | 0.1853 | 0.1850 | 0.1849 | 0.1846 | 0.1850 | 0.1850 | 0.1832 | 0.1831 | 0.1828 | 0.1843 | 0.1844 | 0.1857 | 0.1846 | 0.1856 | 0.1852 | 0.1765 | 0.1835 | 0.1862 | 0.1848 |
| 31 | <i>Myuchelys georgesi</i> Mygeo131               | 0.1759 | 0.1803 | 0.1759 | 0.1760 | 0.1773 | 0.1793 | 0.1800 | 0.1801 | 0.1788 | 0.1789 | 0.1791 | 0.1777 | 0.1776 | 0.1771 | 0.1783 | 0.1784 | 0.1788 | 0.1780 | 0.1781 | 0.1779 | 0.1721 | 0.1831 | 0.1816 | 0.1810 |
| 32 | <i>Myuchelys latisternum</i> Mylat127            | 0.1753 | 0.1788 | 0.1737 | 0.1742 | 0.1757 | 0.1759 | 0.1780 | 0.1779 | 0.1769 | 0.1770 | 0.1772 | 0.1768 | 0.1767 | 0.1763 | 0.1771 | 0.1772 | 0.1771 | 0.1767 | 0.1769 | 0.1769 | 0.1699 | 0.1791 | 0.1806 | 0.1784 |
| 33 | <i>Myuchelys bellii</i> KY924930                 | 0.1756 | 0.1801 | 0.1752 | 0.1755 | 0.1774 | 0.1783 | 0.1799 | 0.1800 | 0.1790 | 0.1791 | 0.1793 | 0.1790 | 0.1790 | 0.1785 | 0.1791 | 0.1792 | 0.1792 | 0.1788 | 0.1787 | 0.1788 | 0.1715 | 0.1806 | 0.1817 | 0.1797 |
| 34 | <i>Phrynops bellii</i> holotype                  | 0.1750 | 0.1792 | 0.1744 | 0.1746 | 0.1764 | 0.1774 | 0.1789 | 0.1792 | 0.1782 | 0.1783 | 0.1785 | 0.1780 | 0.1780 | 0.1774 | 0.1783 | 0.1783 | 0.1783 | 0.1778 | 0.1778 | 0.1779 | 0.1707 | 0.1798 | 0.1808 | 0.1789 |
| 35 | <i>Hydraspis victoriae</i> paralectotype         | 0.1746 | 0.1785 | 0.1744 | 0.1746 | 0.1771 | 0.1769 | 0.1798 | 0.1794 | 0.1779 | 0.1782 | 0.1784 | 0.1786 | 0.1786 | 0.1782 | 0.1792 | 0.1792 | 0.1780 | 0.1786 | 0.1787 | 0.1784 | 0.1696 | 0.1793 | 0.1818 | 0.1802 |
| 36 | <i>Hydraspis australis</i> holotype              | 0.1768 | 0.1807 | 0.1763 | 0.1765 | 0.1775 | 0.1780 | 0.1809 | 0.1801 | 0.1789 | 0.1792 | 0.1794 | 0.1793 | 0.1792 | 0.1788 | 0.1796 | 0.1797 | 0.1786 | 0.1791 | 0.1790 | 0.1788 | 0.1699 | 0.1810 | 0.1830 | 0.1816 |
| 37 | <i>Emydura macquari</i> Emmac119                 | 0.1759 | 0.1805 | 0.1756 | 0.1758 | 0.1770 | 0.1773 | 0.1798 | 0.1792 | 0.1776 | 0.1778 | 0.1780 | 0.1782 | 0.1782 | 0.1775 | 0.1789 | 0.1789 | 0.1777 | 0.1780 | 0.1782 | 0.1778 | 0.1699 | 0.1809 | 0.1817 | 0.1800 |
| 38 | <i>Hydraspis victoriae</i> lectotype             | 0.1749 | 0.1799 | 0.1750 | 0.1752 | 0.1765 | 0.1768 | 0.1792 | 0.1787 | 0.1770 | 0.1772 | 0.1774 | 0.1776 | 0.1776 | 0.1769 | 0.1784 | 0.1784 | 0.1772 | 0.1776 | 0.1778 | 0.1774 | 0.1693 | 0.1803 | 0.1810 | 0.1796 |
| 39 | <i>Euchelymys subglobosa</i> holotype            | 0.1802 | 0.1831 | 0.1782 | 0.1783 | 0.1793 | 0.1795 | 0.1819 | 0.1816 | 0.1806 | 0.1809 | 0.1811 | 0.1805 | 0.1804 | 0.1801 | 0.1809 | 0.1808 | 0.1817 | 0.1806 | 0.1815 | 0.1810 | 0.1729 | 0.1834 | 0.1857 | 0.1846 |
| 40 | <i>Emydura subglobosa</i> Emsub205               | 0.1788 | 0.1824 | 0.1759 | 0.1757 | 0.1775 | 0.1775 | 0.1804 | 0.1804 | 0.1789 | 0.1791 | 0.1793 | 0.1775 | 0.1775 | 0.1772 | 0.1785 | 0.1786 | 0.1793 | 0.1785 | 0.1792 | 0.1787 | 0.1718 | 0.1833 | 0.1838 | 0.1823 |
| 41 | <i>Emydura subglobosa</i> KC692462               | 0.1822 | 0.1858 | 0.1815 | 0.1819 | 0.1827 | 0.1829 | 0.1858 | 0.1854 | 0.1848 | 0.1850 | 0.1852 | 0.1833 | 0.1833 | 0.1829 | 0.1832 | 0.1833 | 0.1845 | 0.1840 | 0.1842 | 0.1840 | 0.1761 | 0.1857 | 0.1875 | 0.1866 |
| 42 | <i>Emydura tanybaraga</i> Emtan220               | 0.1823 | 0.1857 | 0.1815 | 0.1818 | 0.1825 | 0.1827 | 0.1856 | 0.1852 | 0.1845 | 0.1847 | 0.1849 | 0.1831 | 0.1831 | 0.1827 | 0.1830 | 0.1831 | 0.1843 | 0.1838 | 0.1840 | 0.1838 | 0.1759 | 0.1856 | 0.1875 | 0.1866 |
| 43 | <i>Emydura victoriae</i> Emvic245                | 0.1825 | 0.1846 | 0.1815 | 0.1818 | 0.1822 | 0.1824 | 0.1852 | 0.1852 | 0.1841 | 0.1843 | 0.1845 | 0.1826 | 0.1825 | 0.1821 | 0.1825 | 0.1825 | 0.1837 | 0.1835 | 0.1836 | 0.1836 | 0.1753 | 0.1857 | 0.1867 | 0.1860 |
| 44 | <i>Myuchelys purvisi</i> Mypur130                | 0.1777 | 0.1804 | 0.1783 | 0.1786 | 0.1773 | 0.1782 | 0.1778 | 0.1790 | 0.1785 | 0.1788 |        |        |        |        |        |        |        |        |        |        |        |        |        |        |

Table S5. Continued.

|    |                                          | 25     | 26     | 27     | 28     | 29     | 30     | 31     | 32     | 33     | 34     | 35     | 36     | 37     | 38     | 39     | 40     | 41     | 42     | 43     | 44     | 45     | 46     | 47     | 48 |
|----|------------------------------------------|--------|--------|--------|--------|--------|--------|--------|--------|--------|--------|--------|--------|--------|--------|--------|--------|--------|--------|--------|--------|--------|--------|--------|----|
| 25 | <i>Elseya dentata</i> Elden260           | —      |        |        |        |        |        |        |        |        |        |        |        |        |        |        |        |        |        |        |        |        |        |        |    |
| 26 | <i>Elseya intermedia</i> holotype        | 0.0120 | —      |        |        |        |        |        |        |        |        |        |        |        |        |        |        |        |        |        |        |        |        |        |    |
| 27 | <i>Elseya dentata</i> Elden258           | 0.0121 | 0.0003 | —      |        |        |        |        |        |        |        |        |        |        |        |        |        |        |        |        |        |        |        |        |    |
| 28 | <i>Elseya branderhorsti</i> KC692461     | 0.0234 | 0.0239 | 0.0240 | —      |        |        |        |        |        |        |        |        |        |        |        |        |        |        |        |        |        |        |        |    |
| 29 | <i>Elseya flaviventralis</i> Elmag255    | 0.0259 | 0.0263 | 0.0263 | 0.0204 | —      |        |        |        |        |        |        |        |        |        |        |        |        |        |        |        |        |        |        |    |
| 30 | <i>Elseya albagula</i> Elalb183          | 0.0670 | 0.0676 | 0.0677 | 0.0663 | 0.0660 | —      |        |        |        |        |        |        |        |        |        |        |        |        |        |        |        |        |        |    |
| 31 | <i>Myuchelys georgesii</i> Mygeo131      | 0.1011 | 0.1014 | 0.1016 | 0.1002 | 0.1003 | 0.0943 | —      |        |        |        |        |        |        |        |        |        |        |        |        |        |        |        |        |    |
| 32 | <i>Myuchelys latisternum</i> Mylat127    | 0.1005 | 0.1001 | 0.1004 | 0.0994 | 0.0981 | 0.0936 | 0.0494 | —      |        |        |        |        |        |        |        |        |        |        |        |        |        |        |        |    |
| 33 | <i>Myuchelys bellii</i> KY924930         | 0.1015 | 0.1013 | 0.1015 | 0.1005 | 0.0995 | 0.0949 | 0.0514 | 0.0184 | —      |        |        |        |        |        |        |        |        |        |        |        |        |        |        |    |
| 34 | <i>Phrynops bellii</i> holotype          | 0.1006 | 0.1002 | 0.1005 | 0.0998 | 0.0986 | 0.0942 | 0.0512 | 0.0181 | 0.0011 | —      |        |        |        |        |        |        |        |        |        |        |        |        |        |    |
| 35 | <i>Hydraspis victoriae</i> paralectotype | 0.1046 | 0.1043 | 0.1044 | 0.1030 | 0.1015 | 0.0971 | 0.0610 | 0.0577 | 0.0588 | 0.0585 | —      |        |        |        |        |        |        |        |        |        |        |        |        |    |
| 36 | <i>Hydraspis australis</i> holotype      | 0.1062 | 0.1057 | 0.1059 | 0.1047 | 0.1031 | 0.0977 | 0.0619 | 0.0589 | 0.0604 | 0.0600 | 0.0068 | —      |        |        |        |        |        |        |        |        |        |        |        |    |
| 37 | <i>Emydura macquarii</i> Emmac119        | 0.1035 | 0.1038 | 0.1040 | 0.1022 | 0.1010 | 0.0958 | 0.0604 | 0.0562 | 0.0576 | 0.0572 | 0.0232 | 0.0235 | —      |        |        |        |        |        |        |        |        |        |        |    |
| 38 | <i>Hydraspis victoriae</i> lectotype     | 0.1031 | 0.1031 | 0.1033 | 0.1017 | 0.1007 | 0.0955 | 0.0598 | 0.0555 | 0.0570 | 0.0570 | 0.0231 | 0.0233 | 0.0002 | —      |        |        |        |        |        |        |        |        |        |    |
| 39 | <i>Euchelymys subglobosa</i> holotype    | 0.1102 | 0.1107 | 0.1109 | 0.1086 | 0.1089 | 0.1015 | 0.0709 | 0.0669 | 0.0681 | 0.0677 | 0.0668 | 0.0671 | 0.0649 | 0.0646 | —      |        |        |        |        |        |        |        |        |    |
| 40 | <i>Emydura subglobosa</i> Emsub205       | 0.1067 | 0.1072 | 0.1074 | 0.1060 | 0.1058 | 0.0991 | 0.0694 | 0.0650 | 0.0659 | 0.0657 | 0.0651 | 0.0652 | 0.0629 | 0.0625 | 0.0264 | —      |        |        |        |        |        |        |        |    |
| 41 | ' <i>Emydura subglobosa</i> ' KC692462   | 0.1130 | 0.1137 | 0.1139 | 0.1121 | 0.1115 | 0.1057 | 0.0754 | 0.0726 | 0.0727 | 0.0723 | 0.0731 | 0.0735 | 0.0719 | 0.0715 | 0.0544 | 0.0527 | —      |        |        |        |        |        |        |    |
| 42 | <i>Emydura tanybaraga</i> Emtan220       | 0.1128 | 0.1136 | 0.1137 | 0.1120 | 0.1114 | 0.1057 | 0.0752 | 0.0724 | 0.0726 | 0.0723 | 0.0729 | 0.0732 | 0.0717 | 0.0713 | 0.0540 | 0.0524 | 0.0008 | —      |        |        |        |        |        |    |
| 43 | <i>Emydura victoriae</i> Emvic245        | 0.1114 | 0.1125 | 0.1126 | 0.1116 | 0.1110 | 0.1041 | 0.0745 | 0.0723 | 0.0722 | 0.0719 | 0.0720 | 0.0729 | 0.0715 | 0.0712 | 0.0538 | 0.0517 | 0.0119 | 0.0116 | —      |        |        |        |        |    |
| 44 | <i>Myuchelys purvisi</i> Mypur130        | 0.1156 | 0.1149 | 0.1150 | 0.1153 | 0.1142 | 0.1095 | 0.0994 | 0.0985 | 0.0987 | 0.0984 | 0.1029 | 0.1044 | 0.1012 | 0.1007 | 0.1096 | 0.1069 | 0.1123 | 0.1121 | 0.1105 | —      |        |        |        |    |
| 45 | <i>Elusor macrurus</i> Elmac219          | 0.1123 | 0.1111 | 0.1113 | 0.1111 | 0.1115 | 0.1072 | 0.0955 | 0.0941 | 0.0947 | 0.0941 | 0.0970 | 0.0985 | 0.0962 | 0.0956 | 0.1030 | 0.1016 | 0.1083 | 0.1080 | 0.1070 | 0.0795 | —      |        |        |    |
| 46 | <i>Elusor macrurus</i> KU736930          | 0.1123 | 0.1111 | 0.1113 | 0.1111 | 0.1115 | 0.1072 | 0.0955 | 0.0941 | 0.0947 | 0.0941 | 0.0970 | 0.0985 | 0.0962 | 0.0956 | 0.1030 | 0.1016 | 0.1083 | 0.1080 | 0.1070 | 0.0795 | 0.0000 | —      |        |    |
| 47 | <i>Rheodytes leukops</i> Rhleu239        | 0.1156 | 0.1160 | 0.1163 | 0.1163 | 0.1147 | 0.1115 | 0.1017 | 0.1009 | 0.0991 | 0.0991 | 0.1035 | 0.1053 | 0.1029 | 0.1025 | 0.1074 | 0.1049 | 0.1131 | 0.1130 | 0.1125 | 0.0975 | 0.0953 | 0.0953 | —      |    |
| 48 | <i>Pseudemydura umbrina</i> KY486272     | 0.1888 | 0.1883 | 0.1883 | 0.1889 | 0.1875 | 0.1900 | 0.1844 | 0.1820 | 0.1816 | 0.1817 | 0.1811 | 0.1829 | 0.1816 | 0.1815 | 0.1868 | 0.1852 | 0.1880 | 0.1879 | 0.1871 | 0.1834 | 0.1849 | 0.1849 | 0.1867 | —  |

**Table S6.** Information on DNA extraction and double-stranded DNA library (dsLib) build. Abbreviations: HT—holotype, LT—lectotype, PT—paratype, PLT—paralectotype.

| Nominal taxon                                        | Collection number | Type status | Tissue source for DNA extraction                                            | Preserved since | Amount of tissue used for DNA extraction (mg) | DNA conc. Qubit HS (ng/μl) | Total amount of DNA (ng) | Input DNA for dsLib build (ng) |
|------------------------------------------------------|-------------------|-------------|-----------------------------------------------------------------------------|-----------------|-----------------------------------------------|----------------------------|--------------------------|--------------------------------|
| <b>Samples processed in aDNA laboratory</b>          |                   |             |                                                                             |                 |                                               |                            |                          |                                |
| <i>Chelodina kuchlingi</i> Cann, 1997                | WAM R29411        | HT          | EtOH-preserved muscle tissue from thigh                                     | ca. 1970        | 7.1                                           | 0.306                      | 30.6                     | 8.568                          |
| <i>Chelodina novaeguineae</i> Boulenger, 1888        | BMNH 1946.1.22.36 | LT          | Dry tissue from inside shell                                                | ca. 1885        | 7.0                                           | too low (<0.010)           | <1.0                     | <0.280                         |
| <i>Chelodina oblonga</i> Gray, 1841                  | BMNH 1947.3.5.89  | HT          | Dry tissue from inside shell                                                | ca. 1840        | 14.4                                          | 1.960                      | 196.0                    | 54.880                         |
| <i>Chelodina reimanni</i> Philippen & Großmann, 1990 | MTD 29178         | HT          | EtOH-preserved muscle tissue from thigh                                     | 1990            | 18.0                                          | 0.212                      | 21.2                     | 5.936                          |
| <i>Chelodina siebenrocki</i> Werner, 1901            | ZMB 16491         | HT          | EtOH-preserved muscle tissue from thigh                                     | ca. 1900        | 7.5                                           | too low (<0.010)           | <1.0                     | <0.280                         |
| <i>Eelseya intermedia</i> Gray, 1872                 | BMNH 1947.3.4.14  | HT          | Dry tissue from inguinal region                                             | ca. 1870        | 23.3                                          | 2.500                      | 250.0                    | 70.000                         |
| <i>Euchelymys subglobosa</i> Krefft, 1876            | CE 2320           | HT          | Dry skin                                                                    | ca. 1875        | 29.9                                          | 4.140                      | 414.0                    | 115.920                        |
| <i>Hydraspis australis</i> Gray, 1841                | BMNH 1947.3.4.36  | HT          | Dry tissue from inside shell                                                | ca. 1840        | 35.1                                          | 0.164                      | 16.4                     | 4.592                          |
| <i>Hydraspis victoriae</i> Gray, 1842                | BMNH 1947.3.5.95  | LT*         | Dry tissue from inguinal region                                             | ca. 1840        | 6.2                                           | 0.394                      | 39.4                     | 11.032                         |
| <i>Hydraspis victoriae</i> Gray, 1842                | BMNH 1947.3.5.96  | PLT*        | Dry tissue from inguinal region                                             | ca. 1840        | 13.0                                          | 0.332                      | 33.2                     | 9.296                          |
| <i>Phrynops bellii</i> Gray, 1844                    | OUM 8460          | HT          | Dry tissue from inside shell                                                | ca. 1840        | 33.8                                          | 1.380                      | 138.0                    | 38.640                         |
| <i>Platemys novaeguineae</i> Meyer, 1874             | MTD 8222          | HT          | EtOH-preserved muscle tissue from thigh; specimen boiled during WWII attack | ca. 1873        | 26.4                                          | too low (<0.010)           | <1.0                     | <0.280                         |
| <i>Testudo longicollis</i> Shaw, 1792                | BMNH 1947.3.5.86  | HT          | Dry tissue                                                                  | ca. 1790        | 3.8                                           | 0.230                      | 23.0                     | 6.440                          |

**Table S6. Continued.**

| Nominal taxon                                                                      | Collection number | Type status | Tissue source for DNA extraction        | Preserved since | Amount of tissue used for DNA extraction (mg) | DNA conc. Qubit HS (ng/μl) | Total amount of DNA (ng) | Input DNA for dsLib build (ng) |
|------------------------------------------------------------------------------------|-------------------|-------------|-----------------------------------------|-----------------|-----------------------------------------------|----------------------------|--------------------------|--------------------------------|
| <b>Samples processed in modern DNA laboratory</b>                                  |                   |             |                                         |                 |                                               |                            |                          |                                |
| <i>Chelodina gunaleni</i> McCord & Joseph-Ouni, 2007                               | AMNH R160133      | HT          | EtOH-preserved muscle tissue from thigh | 2007            | n/a                                           | 0.594                      | 59.4                     | 16.632                         |
| <i>Chelodina mccordi</i> Rhodin, 1994                                              | MCZ 176731        | PT          | EtOH-preserved muscle tissue from thigh | 1994            | n/a                                           | 4.680                      | 468.0                    | 131.040                        |
| <i>Chelodina mccordi roteensis</i> McCord, Joseph-Ouni & Hagen, 2007               | AMNH R160132      | HT          | EtOH-preserved muscle tissue from thigh | 2007            | n/a                                           | 0.652                      | 65.2                     | 18.256                         |
| <i>Chelodina mccordi timorlestensis</i> Kuchling, Rhodin, Ibarondo & Trainor, 2007 | WAM 165888        | HT          | EtOH-preserved muscle tissue from thigh | 2007            | n/a                                           | 18.800                     | 1880.0                   | 526.400                        |
| <i>Chelodina reimanni</i> Philippen & Großmann, 1990                               | MTD 42828         | PT          | EtOH-preserved muscle tissue from thigh | 1990            | n/a                                           | 9.200                      | 920.0                    | 257.600                        |
| <i>Chelodina timorensis</i> McCord, Joseph-Ouni & Hagen 2007                       | AMNH R160135      | HT          | EtOH-preserved muscle tissue from thigh | 2007            | n/a                                           | 0.820                      | 82.0                     | 22.960                         |

\* The putative paralectotype is to be identified with the holotype of *H. victoriae* Gray, 1841, see discussion in text.

**Table S7.** Long range PCR primer pairs and internal Sanger sequencing primers used in this study, including their amplified product lengths and overlap.

| Long-range PCR primer pairs designed for bait-library preparation   |                                            | Product size                       | Overlap |
|---------------------------------------------------------------------|--------------------------------------------|------------------------------------|---------|
| based on a set of mt-genomes of all three genera including HQ172157 |                                            |                                    |         |
| Chelodina LR1 For                                                   | 5'-ATGGCACTGAAGMTGCCAAGATG-3'              | ~8,700 bp                          | 106 bp  |
| Chelodina LR1 Rev                                                   | 5'-TGAATAATAGCTACYGCTAGTTC-3'              |                                    |         |
| Chelodina LR2 For                                                   | 5'-ATTACAGCAAAYYTAACAGCAGG-3'              | ~7,800 bp                          |         |
| Chelodina LR2 Rev                                                   | 5'-AAATACTATATGCCTATAARACC-3'              |                                    |         |
| Elseya/Emydura LR1 For                                              | 5'-ATGGCACTGAAGMYGCCAAGATG-3'              | ~8,700 bp                          | 106 bp  |
| Elseya/Emydura LR1 Rev                                              | 5'-TGRATAATGGCTACTGCTAGTTC-3'              |                                    |         |
| Elseya/Emydura LR2 For                                              | 5'-ATTACAGCAAAYYTAACAGCAGG-3'              | ~7,800 bp                          |         |
| Elseya/Emydura LR2 Rev                                              | 5'-AAATACTATATGCCTATAARACC-3'              |                                    |         |
| Internal Sanger sequencing primers for 12S and cyt <i>b</i>         |                                            | Source                             |         |
| 12S-L1091                                                           | 5'-AAAAAGCTTCAAACCTGGGATTAGATACCCCACTAT-3' | Kocher <i>et al.</i> <sup>31</sup> |         |
| mt-c-For2                                                           | 5'-TGAGGVCARATATCATTYTGAG-3'               | Fritz <i>et al.</i> <sup>32</sup>  |         |

**Table S8.** Long-range PCR data for bait library preparation.

| <b>Taxon</b>                              | <b>Collection number</b> | <b>Provenance</b> | <b>Annealing temperature for LR1/LR2</b> | <b>PCR cycles for LR1/LR2</b> |
|-------------------------------------------|--------------------------|-------------------|------------------------------------------|-------------------------------|
| <i>Chelodina longicollis</i> (Shaw, 1794) | MTD7251                  | Pet trade         | 55°C / 50°C                              | 40 / 40                       |
| <i>Elseya novaeguineae</i> (Meyer, 1874)  | MTD137                   | Pet trade         | 60°C / 50°C                              | 35 / 35                       |
| <i>Emydura australis</i> (Gray, 1841)     | MTD3933                  | Pet trade         | 60°C / 55°C                              | 35 / 40                       |

**Table S9.** The 184 deleted sites from the original alignment (16,473 bp), resulting in the 'FULL' alignment of 16,289 bp.

| <b>Locus</b> | <b>Cause</b>                  | <b>Positions excluded</b>      |
|--------------|-------------------------------|--------------------------------|
| atp8–atp6    | 10 bp overlap                 | 14 bp (positions 8141–8154)    |
| atp6–coxIII  | 7–8 bp overlap & frame shift  | 11 bp (positions 8825–8835)    |
| ND3          | Unknown frame shift mechanism | 4 bp (position 9814–9817)      |
| ND3          | Unknown frame shift mechanism | 1 bp (position 9857)           |
| ND4L         | Unknown frame shift mechanism | 1 bp (position 10197)          |
| ND4L         | Unknown frame shift mechanism | 1 bp (position 10363)          |
| ND4L–ND4     | 7 bp overlap                  | 11 bp (positions 10394–10404)  |
| ND5–ND6      | Unalignable non-coding region | 141 bp (positions 13807–13947) |

**Table S10.** Read information of sequenced type specimens with a mapping stringency of two allowed mismatches.

| Nominal taxon                                                                      | Raw reads | Merged reads (min. length 35 bp) without duplicates | % of raw reads | Readpool for assembly | Assembled reads | Average coverage | Average length of assembled reads in bp | MITObim iterations |
|------------------------------------------------------------------------------------|-----------|-----------------------------------------------------|----------------|-----------------------|-----------------|------------------|-----------------------------------------|--------------------|
| <b>Samples processed in aDNA laboratory</b>                                        |           |                                                     |                |                       |                 |                  |                                         |                    |
| <i>Chelodina kuchlingi</i> Cann, 1997                                              | 1,585,505 | 312,453                                             | 19.7           | 312,453               | 3,653           | 18               | 69                                      | 5                  |
| <i>Chelodina novaeguineae</i> Boulenger, 1888                                      | 1,340,173 | 475,633                                             | 35.,5          | 50,000                | 23,539          | 94               | 65                                      | 2                  |
| <i>Chelodina oblonga</i> Gray, 1841                                                | 1,468,609 | 905,238                                             | 61.6           | 50,000                | 28,728          | 138              | 78                                      | 3                  |
| <i>Chelodina reimanni</i> Philippen & Großmann, 1990                               | 1,450,455 | 725,247                                             | 50.0           | 50,000                | 14,763          | 104              | 115                                     | 2                  |
| <i>Chelodina siebenrocki</i> Werner, 1901                                          | 3,497,952 | 423,990                                             | 12.1           | 423,990               | 13,248          | 80               | 97                                      | 5                  |
| <i>Elseya intermedia</i> Gray, 1872                                                | 1,591,120 | 1,160,747                                           | 73.0           | 30,000                | 22,437          | 146              | 107                                     | 4                  |
| <i>Euchelymys subglobosa</i> Krefft, 1876                                          | 1,360,169 | 1,042,845                                           | 76.7           | 30,000                | 21,975          | 160              | 120                                     | 4                  |
| <i>Hydraspis australis</i> Gray, 1841                                              | 1,462,815 | 1,063,969                                           | 72.7           | 30,000                | 22,402          | 142              | 104                                     | 4                  |
| <i>Hydraspis victoriae</i> Gray, 1842                                              | 1,232,106 | 810,984                                             | 65.8           | 50,000                | 26,493          | 140              | 87                                      | 4                  |
| <i>Hydraspis victoriae</i> Gray, 1842                                              | 1,400,179 | 372,030                                             | 26.6           | 50,000                | 18,830          | 83               | 71                                      | 6                  |
| <i>Phrynops bellii</i> Gray, 1844                                                  | 1,334,864 | 464,092                                             | 34.8           | 50,000                | 14,724          | 88               | 97                                      | 4                  |
| <i>Platemys novaeguineae</i> Meyer, 1874                                           | 325,977   | 21,797                                              | 6.7            | 21,797                | 381             | 5                | 86                                      | 4                  |
| <i>Testudo longicollis</i> Shaw, 1792                                              | 1,308,995 | 383,199                                             | 29.3           | 383,199               | 23,902          | 91               | 62                                      | 3                  |
| <b>Samples processed in modern DNA laboratory</b>                                  |           |                                                     |                |                       |                 |                  |                                         |                    |
| <i>Chelodina gunaleni</i> McCord & Joseph-Ouni, 2007                               | 1,319,062 | 1,160,757                                           | 88.0           | 100,000               | 15,486          | 97               | 101                                     | 3                  |
| <i>Chelodina mccordi</i> Rhodin, 1994                                              | 1,479,988 | 1,137,594                                           | 76.9           | 100,000               | 17,660          | 85               | 60                                      | 2                  |
| <i>Chelodina mccordi roteensis</i> McCord, Joseph-Ouni & Hagen, 2007               | 1,499,959 | 1,079,959                                           | 71.9           | 30,000                | 19,169          | 138              | 119                                     | 2                  |
| <i>Chelodina mccordi timorlestensis</i> Kuchling, Rhodin, Ibarondo & Trainor, 2007 | 1,568,861 | 1,180,767                                           | 75.3           | 30,000                | 20,663          | 118              | 93                                      | 2                  |
| <i>Chelodina reimanni</i> Philippen & Großmann, 1990                               | 1,499,629 | 1,241,958                                           | 82.8           | 50,000                | 28,038          | 195              | 115                                     | 2                  |
| <i>Chelodina timorensis</i> McCord, Joseph-Ouni & Hagen 2007                       | 1,465,038 | 1,159,918                                           | 79.2           | 30,000                | 9,935           | 71               | 114                                     | 2                  |

**Table S10. Continued.**

| Nominal taxon                        | Raw reads | Merged reads (min. length 35 bp) without duplicates | % of raw reads | Readpool for assembly | Assembled reads | Average coverage | Average length of assembled reads in bp | MITObim iterations |
|--------------------------------------|-----------|-----------------------------------------------------|----------------|-----------------------|-----------------|------------------|-----------------------------------------|--------------------|
| <b>Extraction and library blanks</b> |           |                                                     |                |                       |                 |                  |                                         |                    |
| Extraction blank aDNA                | 1,157,825 | 28,401                                              | 2.5            | 28,401                | 391             | 5                | 77                                      | 2                  |
| Extraction blank modern DNA          | 1,063,753 | 26,486                                              | 2.5            | 26,486                | 646             | 6                | 83                                      | 4                  |
| Library blank aDNA                   | 952,184   | 13,472                                              | 1.4            | 13,472                | 498             | 5                | 79                                      | 2                  |
| Library blank modern DNA             | 1,058,561 | 16,701                                              | 1.6            | 16,701                | 454             | 5                | 77                                      | 2                  |

**References**

- <sup>1</sup> Meyer, M. & Kircher, M. Illumina sequencing library preparation for highly multiplexed target capture and sequencing. *Cold Spring Harb. Protoc.* **2010**, pdb.prot5448 (2010).
- <sup>2</sup> Fortes, G. G. & Paijmans, J. L. A. Analysis of whole mitogenomes from ancient samples in *Whole Genome Amplification. Methods in Molecular Biology*, 1347 (ed Kroneis, T.), 179–195 (Humana Press, 2015).
- <sup>3</sup> Maricic, T., Whitten, M. & Pääbo, S. Multiplexed DNA sequence capture of mitochondrial genomes using PCR products. *PLoS ONE* **5**, e14004 (2010).
- <sup>4</sup> Horn, S. Target enrichment via DNA hybridization capture in *Ancient DNA: Methods and Protocols. Methods in Molecular Biology*, 840 (eds Shapiro, B. & Hofreiter, M.), 177–188 (Springer, 2012).
- <sup>5</sup> Fritz, U., Gemel, R., Kehlmaier, C., Vamberger, M. & Praschag, P. Phylogeography of the Asian softshell turtle *Amyda cartilaginea* (Boddaert, 1770): evidence for a species complex. *Vertebr. Zool.* **64**, 229–243 (2014).
- <sup>6</sup> Kumar, S., Stecher, G. & Tamura, K. MEGA7: Molecular Evolutionary Genetics Analysis version 7.0 for bigger datasets. *Mol. Biol. Evol.* **33**, 1870–1874 (2016).
- <sup>7</sup> McCord, W. P. & Joseph-Ouni, M. A new species of *Chelodina* (Testudines: Chelidae) from southwestern New Guinea (Papua, Indonesia). *Reptilia (GB)* **52**, 47–52 (2007).
- <sup>8</sup> Cann, J. Kuchling’s long-neck Turtle. *Monitor* **9**, 31–32, 41–44 (1997).
- <sup>9</sup> Rhodin, A. G. J. Chelid turtles of the Australasian Archipelago: II. A new species of *Chelodina* from Roti Island, Indonesia. *Breviora* **498**, 1–31 (1994).
- <sup>10</sup> McCord, W. P., Joseph-Ouni, M. & Hagen, C. A new subspecies of *Chelodina mccordi* (Testudines: Chelidae) from eastern Rote Island, Indonesia. *Reptilia (GB)* **52**:58–61 (2007).

- <sup>11</sup> Kuchling, G., Rhodin, A. G. J., Ibarondo, B. R. & Trainor, C. R. A new subspecies of the snakeneck turtle *Chelodina mccordi* from Timor-Leste (East Timor) (Testudines: Chelidae). *Chelon. Conserv. Biol.* **6**, 213–222 (2007).
- <sup>12</sup> Boulenger, G. A. On the chelydoid chelonians of New Guinea. *Ann. Mus. Civ. Stor. Nat. Genova (Ser. 2)* **6**, 449–452 (1888).
- <sup>13</sup> Wells, R. W. & Wellington, C. R. A classification of the Amphibia and Reptilia of Australia. *Austral. J. Herpetol., Suppl. Ser.* **1**, 1–61 (1985).
- <sup>14</sup> Gray, J. E. A catalogue of the species of reptiles and amphibia hitherto described as inhabiting Australia, with a description of some new species from Western Australia, and some remarks on their geographical distribution in *Journals of Two Expeditions of Discovery in Northwest and Western Australia, Vol. 2, Appendix E* (ed Grey, G.), 422–449 (T. and W. Boone, 1841).
- <sup>15</sup> Philippen, H.-D. & Großmann, P. Eine neue Schlangenhalschildkröte von Neuguinea: *Chelodina reimanni* sp. n. (Reptilia, Testudines, Pleurodira: Chelidae). *Zool. Abh.* **46**, 95–102 (1990).
- <sup>16</sup> Werner, F. Ueber Reptilien und Batrachier aus Ecuador und Neu-Guinea. *Verh. Zool.-Bot. Ges. Wien* **51**, 593–603 (1901).
- <sup>17</sup> McCord, W. P., Joseph-Ouni, M. & Hagen, C. A new species of *Chelodina* (Testudines: Chelidae) from eastern Timor Island (East Timor). *Reptilia (GB)* **52**, 53–57 (2007).
- <sup>18</sup> Gray, J. E. *Appendix to the Catalogue of Shield Reptiles in the Collection of the British Museum. Part I. Testudinata (Tortoises)* (Trustees of the British Museum, 1872).
- <sup>19</sup> Krefft, G. Notes on Australian animals in New Guinea with description of a new species of fresh water tortoise belonging to the genus *Euchelymys* (Gray). *Ann. Mus. Civ. Stor. Nat. Giacomo Doria (Ser. 1)* **8**, 390–394 (1876).
- <sup>20</sup> Gray, J. E. Description of some hitherto unrecorded species of Australian reptiles and batrachians. *Zool. Misc.* **2**, 51–57 (1842).
- <sup>21</sup> Gray, J. E. *Catalogue of the Tortoises, Crocodiles, and Amphisbaenians in the Collection of the British Museum* (Trustees of the British Museum, 1844).
- <sup>22</sup> Meyer, A. B. *Platemys novaeguineae* sp. nov. Eine Mittheilung von Hrn. Adolf Bernhard Meyer über die von ihm auf Neu-Guinea und den Inseln Jobi, Mysore und Mafoor im Jahre 1873 gesammelten Amphibien. *Monatsber. Königl. Preuß. Akad. Wiss. Berlin* **39**, 128–140 (1874).
- <sup>23</sup> Shaw, G. *Zoology of New Holland, Vol. I* (J. Davis, 1794).
- <sup>24</sup> Iverson, J. B., Thomson, S. A. & Georges, A. The validity of the taxonomic changes for turtles proposed by Wells and Wellington. *J. Herpetol.* **35**, 361–368 (2001).
- <sup>25</sup> Zhang, X. & Georges, A. A complete mitochondrial genome sequence for the Australian turtle, *Chelodina longicollis*, obtained using 454-pyrosequencing. *Conserv. Genet. Resour.* **6**, 555–557 (2014).
- <sup>26</sup> Thomson, S. The identification of the holotype of *Chelodina oblonga* (Testudinata: Chelidae) with a discussion of taxonomic implications. *Chelon. Conserv. Biol.* **3**, 745–749 (2000).
- <sup>27</sup> Wang, L. *et al.* The complete mitochondrial genome sequences of *Chelodina rugosa* and *Chelus fimbriata* (Pleurodira: Chelidae): implications of a common absence of initiation sites (OL) in pleurodiran turtles. *Mol. Biol. Rep.* **39**, 2097–2107 (2012).
- <sup>28</sup> Schmidt, D. J., Brockett, B., Espinoza, T., Connell, M. & Hughes, J. Complete mitochondrial genome of the endangered Mary River turtle (*Elusor macrurus*) and low mtDNA variation across the species. *Austral. J. Zool.* **64**, 117–121 (2016).
- <sup>29</sup> Zhang, X., Unmack, P. J., Kuchling, G., Wang, Y. & Georges, A. Resolution of the enigmatic phylogenetic relationship of the critically endangered western swamp tortoise *Pseudemydura umbrina* (Pleurodira: Chelidae) using a complete mitochondrial genome. *Mol. Phylogenet. Evol.* **115**, 58–61 (2017).
- <sup>30</sup> Zardoya, R. & Meyer, A. Complete mitochondrial genome suggests diapsid affinities of turtles. *Proc. Natl. Acad. Sci. USA* **95**, 14226–14321 (1998).

- <sup>31</sup> Kocher, T. D. *et al.* Dynamics of mitochondrial DNA evolution in mammals: amplification and sequencing with conserved primers. *Proc. Natl. Acad. Sci. USA* **86**, 6196–6200 (1989).
- <sup>32</sup> Fritz, U. *et al.* A rangewide phylogeography of Hermann's tortoise, *Testudo hermanni* (Reptilia: Testudines: Testudinidae): implications for taxonomy. *Zool. Scr.* **35**, 531–543 (2006).
